# Supplementary material
Source: PubMed Central journal article supplement (PMC6409193)
Supplement: NIHMS1517050-supplement-1.pdf [file NIHMS1517050-supplement-1.pdf]

**Supplementary Table S1.** Distribution by tumor type and clinical efficacy of pembrolizumab in dMMR/MSI-H GI cancers.

| <b>Tumor type</b>               | <b>Patients enrolled (n)</b> | <b>Clinical trials (phase)</b>                                                                                    | <b>Objective response rate, n (%)</b> | <b>Duration of response, range (mo)</b> |
|---------------------------------|------------------------------|-------------------------------------------------------------------------------------------------------------------|---------------------------------------|-----------------------------------------|
| <b>Colorectal cancer</b>        | 90                           | KEYNOTE-016 (2, multicohort)<br>KEYNOTE-164 (2)<br>KEYNOTE-028 (1b, multicohort)                                  | 32 (36%, 95% CI 26% - 46%)            | 1.6+ - 22.7+ mo                         |
| <b>Gastrointestinal non-CRC</b> | 24                           | KEYNOTE-016 (2, multicohort)<br>KEYNOTE-012 (1b, multicohort)<br>KEYNOTE-028 (1b, multicohort)<br>KEYNOTE-158 (2) | 14 (58%)                              | 1.9+ - 22.1+ mo                         |
| Gastric cancer/GEJ cancer       | 9                            |                                                                                                                   | 5 (56%, 95% CI 21% - 86%)             | 5.8+ - 22.1+ mo                         |
| Pancreatic cancer               | 6                            |                                                                                                                   | 5 (83%, 95% CI 36% - 100%)            | 2.6+ - 9.2+ mo                          |
| Small intestinal cancer         | 8                            |                                                                                                                   | 3 (38%, 95% CI 9% - 76%)              | 1.9+ - 9.1+ mo                          |
| Esophageal cancer               | 1                            |                                                                                                                   | 1 PR                                  | 18.2+ mo                                |

Adapted from pembrolizumab FDA Highlights of Prescribing Information document. 

Abbreviations: CRC, colorectal cancer; GEJ, gastro-esophageal junction; CI, confidence interval; PR, partial response; mo, months.

**Supplementary Table S2.** Ongoing clinical trials testing different ICI-based strategies in GI cancers.

| NCT Number               | Phase | IC Ab                     | Interventions                                                                                           | Setting  | Title                                                                                                                                                                                           |
|--------------------------|-------|---------------------------|---------------------------------------------------------------------------------------------------------|----------|-------------------------------------------------------------------------------------------------------------------------------------------------------------------------------------------------|
| <b>Colorectal cancer</b> |       |                           |                                                                                                         |          |                                                                                                                                                                                                 |
| NCT03555149              | 1/2   | Anti-PD-L1<br>Anti-CD38   | Atezolizumab (anti-PD-L1)<br>Isatuximab (anti-CD38)<br>Regorafenib<br>Imprime PGG (PAMP)<br>Bevacizumab | Advanced | A Study Evaluating the Efficacy and Safety of Multiple Immunotherapy-Based Treatment Combinations in Patients With Metastatic Colorectal Cancer (Morpheus-CRC)                                  |
| NCT03507699              | 1     | Anti-PD-1<br>Anti-CTLA-4  | Nivolumab (anti-PD-1)<br>Ipilimumab (anti-CTLA-4)<br>CMP-001 (TLR9 agonist)<br>Radiotherapy             | Advanced | Combined Immunotherapy and Radiosurgery for Metastatic Colorectal Cancer                                                                                                                        |
| NCT03414983              | 2/3   | Anti-PD-1                 | Nivolumab (anti-PD-1)<br>Oxaliplatin<br>Leucovorin<br>Fluorouracil<br>Bevacizumab                       | Advanced | An Investigational Immunotherapy Study of Nivolumab With Standard of Care Therapy vs Standard of Care Therapy for First-Line Treatment of Colorectal Cancer That Has Spread                     |
| NCT03377361              | 1/2   | Anti-PD-1<br>Anti-CTLA-4  | Nivolumab (anti-PD-1)<br>Ipilimumab (anti-CTLA-4)<br>Trametinib                                         | Advanced | An Investigational Immunotherapy Study of Nivolumab In Combination With Trametinib With or Without Ipilimumab In Patients With Previously Treated Cancer of the Colon or Rectum That Has Spread |
| NCT03202758              | 1/2   | Anti-PD-L1<br>Anti-CTLA-4 | Durvalumab (anti-PD-L1)<br>Tremelimumab (anti-CTLA-4)<br>FOLFOX                                         | Advanced | Evaluation of the Safety and the Tolerability of Durvalumab Plus Tremelimumab Combined With FOLFOX in mCRC                                                                                      |
| NCT03186326              | 2     | Anti-PD-L1                | Avelumab (anti-PD-L1)<br>Panitumumab/Cetuximab<br>Bevacizumab/Aflibercept<br>FOLFOX/FOLFIRI             | Advanced | Standard Chemotherapy vs Immunotherapy in Second-Line Treatment of MSI Colorectal Metastatic Cancer                                                                                             |

|             |     |                           |                                                                                                                                                                                                                                                                                                                                       |           |                                                                                                                           |
|-------------|-----|---------------------------|---------------------------------------------------------------------------------------------------------------------------------------------------------------------------------------------------------------------------------------------------------------------------------------------------------------------------------------|-----------|---------------------------------------------------------------------------------------------------------------------------|
| NCT03169777 | 1/2 | Anti-PD-1<br>Anti-PD-L1   | Nivolumab (anti-PD-1)<br>Avelumab (anti-PD-L1)<br>Bevacizumab<br>Capecitabine<br>Cetuximab<br>Cyclophosphamide<br>Fluorouracil<br>Fulvestrant<br>Leucovorin<br>Nab-paclitaxel<br>Omega-3-acid ethyl esters<br>Oxaliplatin<br>SBRT<br>ALT-803<br>ETBX-011<br>ETBX-021<br>ETBX-051<br>ETBX-061<br>GI-4000<br>GI-6207<br>GI-6301<br>haNK | Advanced  | QUILT-3.050: NANT Colorectal Cancer (CRC) Vaccine: Combination Immunotherapy in Subjects With Recurrent or Metastatic CRC |
| NCT03127007 | 1/2 | Anti-PD-L1                | Atezolizumab (anti-PD-L1)<br>Chemoradiotherapy                                                                                                                                                                                                                                                                                        | Localized | Safety and Efficacy of Atezolizumab Combined to Preoperative Radio-chemotherapy in Localized Rectal Cancer                |
| NCT03101475 | 2   | Anti-PD-L1<br>Anti-CTLA-4 | Durvalumab (anti-PD-L1)<br>Tremelimumab (anti-CTLA-4)<br>SBRT<br>Radiofrequency ablation                                                                                                                                                                                                                                              | Advanced  | Synergism of Immunomodulation and Tumor Ablation                                                                          |
| NCT03026140 | 2   | Anti-PD-1<br>Anti-CTLA-4  | Nivolumab (anti-PD-1)<br>Ipilimumab (anti-CTLA-4)<br>Celecoxib                                                                                                                                                                                                                                                                        | Localized | Nivolumab, Ipilimumab and COX2-inhibition in Early Stage Colon Cancer: an Unbiased Approach for Signals of Sensitivity    |

|                                                     |     |                                        |                                                                                                                                                                                         |           |                                                                                                                                                                                                           |
|-----------------------------------------------------|-----|----------------------------------------|-----------------------------------------------------------------------------------------------------------------------------------------------------------------------------------------|-----------|-----------------------------------------------------------------------------------------------------------------------------------------------------------------------------------------------------------|
| NCT02997228                                         | 3   | Anti-PD-L1                             | Atezolizumab (anti-PD-L1)<br>Bevacizumab<br>Fluorouracil<br>Leucovorin<br>Oxaliplatin                                                                                                   | Advanced  | Combination Chemotherapy, Bevacizumab, and/or Atezolizumab in Treating Patients With Deficient DNA Mismatch Repair Metastatic Colorectal Cancer                                                           |
| NCT02876224                                         | 1   | Anti-PD-L1                             | Atezolizumab (anti-PD-L1)<br>Bevacizumab<br>Cobimetinib                                                                                                                                 | Advanced  | Study of Cobimetinib in Combination With Atezolizumab and Bevacizumab in Participants With Gastrointestinal and Other Tumors                                                                              |
| NCT02060188                                         | 2   | Anti-PD-1<br>Anti-CTLA-4<br>Anti-LAG-3 | Nivolumab (anti-PD-1)<br>Ipilimumab (anti-CTLA-4)<br>Anti-LAG-3<br>Cobimetinib<br>Daratumumab                                                                                           | Advanced  | An Investigational Immunotherapy Study of Nivolumab, and Nivolumab in Combination With Other Anticancer Drugs, in Colon Cancer That Has Come Back or Has Spread                                           |
| <b>Gastric cancer &amp; Gastroesophageal cancer</b> |     |                                        |                                                                                                                                                                                         |           |                                                                                                                                                                                                           |
| NCT03448835                                         | 2   | Anti-PD-L1                             | Atezolizumab (anti-PD-L1)<br>Capecitabine<br>Oxaliplatin<br>Docetaxel                                                                                                                   | Localized | Neoadjuvant Capecitabine, Oxaliplatin, Docetaxel and Atezolizumab in Resectable Gastric and GE-junction Cancer (PANDA)                                                                                    |
| NCT03443856                                         | 2   | Anti-PD-1<br>Anti-CTLA-4               | Nivolumab (anti-PD-1)<br>Ipilimumab (anti-CTLA-4)<br>Chemotherapy                                                                                                                       | Localized | Postoperative Immunotherapy vs Standard Chemotherapy for Gastric Cancer With High Risk for Recurrence                                                                                                     |
| NCT03281369                                         | 1/2 | Anti-PD-L1                             | Atezolizumab (anti-PD-L1)<br>BL-8040 (anti-CXCR4)<br>Fluorouracil<br>Leucovorin<br>Oxaliplatin<br>Cobimetinib<br>Ramucirumab<br>Paclitaxel<br>PEGylated recombinant human hyaluronidase | Advanced  | A Study of Multiple Immunotherapy-Based Treatment Combinations in Patients With Locally Advanced Unresectable or Metastatic Gastric or Gastroesophageal Junction Cancer (G/GEJ) (Morpheus-Gastric Cancer) |

|                          |     |                           |                                                                                                                                   |                        |                                                                                                                                                                                  |
|--------------------------|-----|---------------------------|-----------------------------------------------------------------------------------------------------------------------------------|------------------------|----------------------------------------------------------------------------------------------------------------------------------------------------------------------------------|
|                          |     |                           | Linagliptin                                                                                                                       |                        |                                                                                                                                                                                  |
| NCT02340975              | 1/2 | Anti-PD-L1<br>Anti-CTLA-4 | Durvalumab (anti-PD-L1)<br>Tremelimumab (anti-CTLA-4)                                                                             | Advanced               | A Phase 1b/2 Study of MEDI4736 With Tremelimumab, MEDI4736 or Tremelimumab Monotherapy in Gastric or GEJ Adenocarcinoma                                                          |
| NCT02689284              | 1/2 | Anti-PD-1                 | Pembrolizumab (anti-PD-1)<br>Margetuximab                                                                                         | Advanced               | Combination Margetuximab and Pembrolizumab for Advanced, Metastatic HER2(+) Gastric or Gastroesophageal Junction Cancer                                                          |
| NCT03382600              | 2   | Anti-PD-1                 | Pembrolizumab (anti-PD-1)<br>Oxaliplatin<br>TS-1<br>Cisplatin                                                                     | Advanced               | Safety and Efficacy of Pembrolizumab (MK-3475) in Combination With TS-1 + Cisplatin or TS-1 + Oxaliplatin as First-Line Chemotherapy in Gastric Cancer (MK-3475-659/KEYNOTE-659) |
| NCT03409848              | 2   | Anti-PD-1<br>Anti-CTLA-4  | Nivolumab (anti-PD-1)<br>Ipilimumab (anti-CTLA-4)                                                                                 | Advanced               | Ipilimumab or FOLFOX in Combination With Nivolumab and Trastuzumab in HER2 Positive Esophago-Gastric Adenocarcinoma                                                              |
| <b>Esophageal cancer</b> |     |                           |                                                                                                                                   |                        |                                                                                                                                                                                  |
| NCT03416244              | 2   | Anti-PD-1<br>Anti-CTLA-4  | Nivolumab (anti-PD-1)<br>Ipilimumab (anti-CTLA-4)                                                                                 | Advanced               | A Multicenter Open-label Phase II Trial to Evaluate Nivolumab and Ipilimumab for Second-Line Therapy in Elderly Patients With Advanced Esophageal Squamous Cell Cancer           |
| NCT03544736              | 1/2 | Anti-PD-1                 | Nivolumab (anti-PD-1)<br>Radiotherapy<br>Chemotherapy<br>Surgery                                                                  | Advanced/<br>Localized | Safety and Feasibility of Irradiation and Nivolumab in Esophageal Cancer (INEC)                                                                                                  |
| NCT03437200              | 2   | Anti-PD-1<br>Anti-CTLA-4  | Nivolumab (anti-PD-1)<br>Ipilimumab (anti-CTLA-4)<br>Chemoradiotherapy                                                            | Advanced               | Combination of Chemoradiation With Immunotherapy in Inoperable Esophageal Cancer                                                                                                 |
| NCT03377400              | 2   | Anti-PD-L1                | Durvalumab (anti-PD-L1)                                                                                                           | Advanced               | Definitive CCRT Combined With Durvalumab and Tremelimumab for Inoperable Esophageal Cancer                                                                                       |
| NCT02735239              | 1/2 | Anti-PD-L1<br>Anti-CTLA-4 | Durvalumab (anti-PD-L1)<br>Tremelimumab (anti-CTLA-4)<br>Oxaliplatin<br>Capecitabine<br>Paclitaxel<br>Carboplatin<br>Radiotherapy | Advanced/<br>Localized | Study of Anti-PD-L1 in Combination With Chemo(Radio) Therapy for Esophageal Cancer                                                                                               |

**Pancreatic cancer**

|             |     |             |                                                                                                                                                            |           |                                                                                                                                                              |
|-------------|-----|-------------|------------------------------------------------------------------------------------------------------------------------------------------------------------|-----------|--------------------------------------------------------------------------------------------------------------------------------------------------------------|
| NCT03336216 | 2   | Anti-PD-1   | Nivolumab (anti-PD-1)<br>Cabiralizumab<br>Nab-paclitaxel<br>Liposomal irinotecan<br>Fluorouracil<br>Gemcitabine<br>Oxaliplatin<br>Leucovorin<br>Irinotecan | Advanced  | A Study of Cabiralizumab Given With Nivolumab With and Without Chemotherapy in Patients With Advanced Pancreatic Cancer                                      |
| NCT03193190 | 1/2 | Anti-PD-L1  | Atezolizumab (anti-PD-L1)<br>BL-8040 (anti-CXCR4)<br>Nab-Paclitaxel<br>Gemcitabine<br>Oxaliplatin<br>Leucovorin<br>Fluorouracil<br>Cobimetinib<br>PEGPH20  | Advanced  | A Study of Multiple Immunotherapy-Based Treatment Combinations in Participants With Metastatic Pancreatic Ductal Adenocarcinoma (Morpheus-Pancreatic Cancer) |
| NCT03168139 | 1/2 | Anti-PD-1   | Pembrolizumab (anti-PD-1)<br>Olaptesed pegol                                                                                                               | Advanced  | Olaptesed (NOX-A12) Alone and in Combination With Pembrolizumab in Colorectal and Pancreatic Cancer                                                          |
| NCT03161379 | 2   | Anti-PD-1   | Nivolumab (anti-PD-1)<br>Cyclophosphamide<br>GVAX<br>SBRT                                                                                                  | Localized | Phase 2 GVAX Pancreas Vaccine (With CY) in Combination With Nivolumab and SBRT for Patients With Borderline Resectable Pancreatic Cancer                     |
| NCT03153410 | 1   | Anti-PD-1   | Pembrolizumab (anti-PD-1)<br>IMC-CS4 (anti-CSF1R)<br>Cyclophosphamide<br>GVAX                                                                              | Localized | Pilot Study With CY, Pembrolizumab, GVAX, and IMC-CS4 (LY3022855) in Patients With Borderline Resectable Adenocarcinoma of the Pancreas                      |
| NCT03098160 | 1   | anti-CTLA-4 | Ipilimumab (anti-CTLA-4)<br>Evofosfamide                                                                                                                   | Advanced  | Immunotherapy Study of Evofosfamide in Combination With Ipilimumab                                                                                           |

|                                 |     |                          |                                                                       |           |                                                                                                                                                                                                                                  |
|---------------------------------|-----|--------------------------|-----------------------------------------------------------------------|-----------|----------------------------------------------------------------------------------------------------------------------------------------------------------------------------------------------------------------------------------|
| NCT02734160                     | 1   | Anti-PD-L1               | Durvalumab (anti-PD-L1)<br>Galunisertib (TGFβ-Rli)                    | Advanced  | A Study of Galunisertib (LY2157299) and Durvalumab (MEDI4736) in Participants With Metastatic Pancreatic Cancer                                                                                                                  |
| NCT02648282                     | 2   | Anti-PD-1                | Pembrolizumab (anti-PD-1)<br>Cyclophosphamide<br>GVAX<br>SBRT         | Advanced  | Study With CY, Pembrolizumab, GVAX, and SBRT in Patients With Locally Advanced Pancreatic Cancer                                                                                                                                 |
| NCT02305186                     | 1/2 | Anti-PD-1                | Pembrolizumab (anti-PD-1)<br>Chemoradiotherapy                        | Localized | Safety and Immunological Effect of Pembrolizumab in Resectable or Borderline Resectable Pancreatic Cancer                                                                                                                        |
| <b>Hepatocellular carcinoma</b> |     |                          |                                                                       |           |                                                                                                                                                                                                                                  |
| NCT03510871                     | 2   | Anti-PD-1<br>Anti-CTLA-4 | Nivolumab (anti-PD-1)<br>Ipilimumab (anti-CTLA-4)                     | Localized | Nivolumab Plus Ipilimumab as Neoadjuvant Therapy for Hepatocellular Carcinoma (HCC)                                                                                                                                              |
| NCT03299946                     | 1   | Anti-PD-1                | Nivolumab (anti-PD-1)<br>Cabozantinib                                 | Localized | Feasibility and Efficacy of Neoadjuvant Cabozantinib Plus Nivolumab (CaboNivo) Followed by Definitive Resection for Patients With Locally Advanced Hepatocellular Carcinoma (HCC)                                                |
| NCT03203304                     | 1   | Anti-PD-1<br>Anti-CTLA-4 | Nivolumab (anti-PD-1)<br>Ipilimumab (anti-CTLA-4)<br>SBRT             | Advanced  | Stereotactic Body Radiotherapy (SBRT) Followed by Immunotherapy in Liver Cancer                                                                                                                                                  |
| NCT03071094                     | 1/2 | Anti-PD-1                | Nivolumab (anti-PD-1)<br>Pexastimogene Devacirepvec                   | Advanced  | A Trial to Evaluate the Safety and Efficacy of the Combination of the Oncolytic Immunotherapy Pexa-Vec With the PD-1 Receptor Blocking Antibody Nivolumab in the First-Line Treatment of Advanced Hepatocellular Carcinoma (HCC) |
| NCT02988440                     | 1   | Anti-PD-1                | PDR001 (anti-PD-1)<br>Sorafenib                                       | Advanced  | Study of Safety and Tolerability of PDR001 in Combination With Sorafenib and to Identify the Maximum Tolerated Dose and/or Phase 2 Dose for This Combination in Advanced Hepatocellular Patients                                 |
| NCT02886897                     | 1/2 | Anti-PD-1                | Anti-PD-1<br>Dendritic cell activated<br>cytokine-induced killer cell | Advanced  | A Study of Combinations of D-CIK Immunotherapy And Anti-PD-1 In Refractory Solid Tumors                                                                                                                                          |
| NCT02576509                     | 3   | Anti-PD-1                | Nivolumab (anti-PD-1)<br>Sorafenib                                    | Advanced  | An Investigational Immuno-therapy Study of Nivolumab Compared to Sorafenib as a First Treatment in Patients With Advanced Hepatocellular Carcinoma                                                                               |

|                                                                       |     |                           |                                                                                         |                        |                                                                                                                                                                                                                            |
|-----------------------------------------------------------------------|-----|---------------------------|-----------------------------------------------------------------------------------------|------------------------|----------------------------------------------------------------------------------------------------------------------------------------------------------------------------------------------------------------------------|
| NCT02519348                                                           | 2   | Anti-PD-L1<br>Anti-CTLA-4 | Durvalumab (anti-PD-L1)<br>Tremelimumab (anti-CTLA-4)                                   | Advanced               | A Study of MEDI4736 With Tremelimumab, MEDI4736 or Tremelimumab Monotherapy in Unresectable Hepatocellular Carcinoma                                                                                                       |
| NCT01658878                                                           | 1/2 | Anti-PD-1<br>Anti-CTLA-4  | Nivolumab (anti-PD-1)<br>Ipilimumab (anti-CTLA-4)<br>Sorafenib<br>Cabozantinib          | Advanced               | An Immunotherapy Study to Evaluate the Effectiveness, Safety and Tolerability of Nivolumab or Nivolumab in Combination With Other Agents in Patients With Advanced Liver Cancer                                            |
| <b>Biliary tract cancers</b>                                          |     |                           |                                                                                         |                        |                                                                                                                                                                                                                            |
| NCT03110328                                                           | 2   | Anti-PD-1                 | Pembrolizumab (anti-PD-1)                                                               | Advanced               | Study of Pembrolizumab in Metastatic Biliary Tract Cancer as Second-Line Treatment After Failing to at Least One Cytotoxic Chemotherapy Regimen: Integration of Genomic Analysis to Identify Predictive Molecular Subtypes |
| NCT03101566                                                           | 2   | Anti-PD-1<br>Anti-CTLA-4  | Nivolumab (anti-PD-1)<br>Ipilimumab (anti-CTLA-4)<br>Gemcitabine<br>Cisplatin           | Advanced               | Study of Nivolumab in Combination With Gemcitabine/Cisplatin or Ipilimumab for Patients With Advanced Unresectable Biliary Tract Cancer                                                                                    |
| NCT02829918                                                           | 2   | Anti-PD-1                 | Nivolumab (anti-PD-1)                                                                   | Advanced               | Study of Nivolumab in Patients With Advanced Refractory Biliary Tract Cancers                                                                                                                                              |
| NCT02982720                                                           | 2   | Anti-PD-1                 | Pembrolizumab (anti-PD-1)<br>Sylatron (Peg-IFN $\alpha$ -2b)                            | Advanced               | Evaluating Combination Immunotherapy for Advanced Cholangiocarcinoma With Pembrolizumab and PEG-Intron                                                                                                                     |
| <b>Miscellany</b>                                                     |     |                           |                                                                                         |                        |                                                                                                                                                                                                                            |
| <b>Colorectal cancer &amp; Pancreatic cancer</b>                      |     |                           |                                                                                         |                        |                                                                                                                                                                                                                            |
| NCT03373188                                                           | 1   | Anti-PD-1<br>Anti-CTLA-4  | Nivolumab (anti-PD-1)<br>Ipilimumab (anti-CTLA-4)<br>VX15/2503 (anti-SEMA4D)<br>Surgery | Localized/<br>Advanced | VX15/2503 and Immunotherapy in Resectable Pancreatic and Colorectal Cancer                                                                                                                                                 |
| <b>Cholangiocarcinoma &amp; Pancreatic cancer</b>                     |     |                           |                                                                                         |                        |                                                                                                                                                                                                                            |
| NCT03250273                                                           | 2   | Anti-PD-1                 | Nivolumab (anti-PD-1)<br>Entinostat (HDACi)                                             | Advanced               | A Clinical Trial of Entinostat in Combination With Nivolumab for Patients With Previously Treated Unresectable or Metastatic Cholangiocarcinoma and Pancreatic Adenocarcinoma                                              |
| <b>Colorectal cancer, Pancreatic cancer &amp; Other Non-GI tumors</b> |     |                           |                                                                                         |                        |                                                                                                                                                                                                                            |



|                                                                                                                 |     |                         |                                                                                          |           |                                                                                                                                                                            |
|-----------------------------------------------------------------------------------------------------------------|-----|-------------------------|------------------------------------------------------------------------------------------|-----------|----------------------------------------------------------------------------------------------------------------------------------------------------------------------------|
| NCT03549000                                                                                                     | 1   | Anti-PD-1<br>Anti-CD73  | PDR001 (anti-PD-1)<br>NZV930 (anti-CD73)<br>NIR178 (anti-A2AR)                           | Advanced  | A Phase I/Ib Study of NZV930 Alone and in Combination With PDR001 and /or NIR178 in Patients With Advanced Malignancies.                                                   |
| NCT03058289                                                                                                     | 1/2 | Anti-PD-1               | Anti-PD-1<br>INT230-6                                                                    | Advanced  | A Phase 1/2 Safety Study of Intratumorally Dosed INT230-6                                                                                                                  |
| <b>Colorectal cancer, Pancreatic cancer, Esophageal cancer &amp; Other Non-GI tumors</b>                        |     |                         |                                                                                          |           |                                                                                                                                                                            |
| NCT01351103                                                                                                     | 1   | Anti-PD-1               | PDR001 (anti-PD-1)<br>LGK974 (PORCNI) <sup>a</sup>                                       | Advanced  | A Study of LGK974 in Patients With Malignancies Dependent on Wnt Ligands                                                                                                   |
| <b>Colorectal cancer, Pancreatic cancer, Gastric cancer, Hepatocellular carcinoma &amp; Other Non-GI tumors</b> |     |                         |                                                                                          |           |                                                                                                                                                                            |
| NCT01174121                                                                                                     | 2   | Anti-PD-1               | Pembrolizumab (anti-PD-1)<br>Young TIL<br>Aldesleukin<br>Cyclophosphamide<br>Fludarabine | Advanced  | Immunotherapy Using Tumor Infiltrating Lymphocytes for Patients With Metastatic Cancer                                                                                     |
| <b>Solid tumors</b>                                                                                             |     |                         |                                                                                          |           |                                                                                                                                                                            |
| NCT03511222                                                                                                     | 1   | Anti-PD-1               | Nivolumab (anti-PD-1)<br>Pembrolizumab (anti-PD-1)<br>Vorolanib                          | Advanced  | Vorolanib (X-82) Combined With Checkpoint Inhibitors in Patients With Solid Tumors <sup>b</sup>                                                                            |
| NCT03474640                                                                                                     | 1   | Anti-PD-1               | TAB001 (anti-PD-1)                                                                       | Advanced  | Safety, Tolerability and Pharmacokinetics of an Anti-PD-1 Monoclonal Antibody in Subjects With Advanced Malignancies                                                       |
| NCT03289962                                                                                                     | 1   | Anti-PD-L1              | Atezolizumab (anti-PD-L1)<br>RO7198457                                                   | Advanced  | A Study of RO7198457 (Personalized Cancer Vaccine [PCV]) as a Single Agent and in Combination With Atezolizumab in Participants With Locally Advanced or Metastatic Tumors |
| NCT02817633                                                                                                     | 1   | Anti-PD-1<br>Anti-TIM-3 | Anti-PD-1<br>TSR-022 (anti-TIM-3)                                                        | Advanced  | A Phase 1 Study of TSR-022, an Anti-TIM-3 Monoclonal Antibody, in Patients With Advanced Solid Tumors                                                                      |
| NCT02743494                                                                                                     | 3   | Anti-PD-1               | Nivolumab (anti-PD-1)                                                                    | Localized | An Investigational Immuno-therapy Study of Nivolumab or Placebo in Patients With Resected Esophageal or Gastroesophageal Junction Cancer                                   |

|             |   |                          |                                                                               |          |                                                                                                                |
|-------------|---|--------------------------|-------------------------------------------------------------------------------|----------|----------------------------------------------------------------------------------------------------------------|
| NCT02554812 | 2 | Anti-PD-L1<br>anti-CD137 | Avelumab (anti-PD-L1)<br>Utomilumab (anti-CD137)<br>PF-04518600<br>PD 0360324 | Advanced | A Study Of Avelumab In Combination With Other Cancer Immunotherapies In Advanced Malignancies (JAVELIN Medley) |
|-------------|---|--------------------------|-------------------------------------------------------------------------------|----------|----------------------------------------------------------------------------------------------------------------|

<sup>a</sup> Wnt signaling inhibitor.

<sup>b</sup> Dose escalation cohort: histologically or cytologically confirmed diagnosis of a solid tumor that can be treated with either pembrolizumab or nivolumab as part of standard of care.

Abbreviations: ICI, immune checkpoint inhibitors; GI, gastrointestinal; IC Ab, immune checkpoint antibody; PAMP, pathogen-associated molecular pattern; SBRT, stereotactic body radiotherapy; TGFβ-Rli, TGFβ-Receptor I inhibitor; HDACi, histone deacetylase inhibitor; A2AR, adenosine A2A receptor; PORCNI, porcupine inhibitor; TIL, tumor-infiltrating lymphocytes.
